# Supplementary material for: Recent advances in high-performance organic solar cells enabled by acceptor–donor–acceptor–donor–acceptor (A–DA′D–A) type acceptors
Source: Royal Society of Chemistry journal article supplement (doi:10.1039/d0qm00305k), 2020-01-01
Supplement: d0qm00305k1.pdf [file d0qm00305k1.pdf]

## Supporting Information

### Recent Advances in High-performance Organic Solar Cells Enabled by Acceptor-Donor-Acceptor-Donor-Acceptor (A-DA'D-A) Type Acceptors

*Jiajun Zhao<sup>a</sup>, Chao Yao<sup>a</sup>, Muhammad Umair Alia<sup>a,b</sup>, Jingsheng Miao<sup>\*\*a</sup>, and Hong Meng<sup>\*a</sup>*

<sup>a</sup> *School of Advanced Materials, Peking University Shenzhen Graduate School, Shenzhen 518055, China.*

<sup>b</sup> *Department of Materials Science and Engineering, College of Engineering, Peking University, Beijing 100871, China*

*E-mail: menghong@pku.edu.cn, miaojs@pkusz.edu.cn*

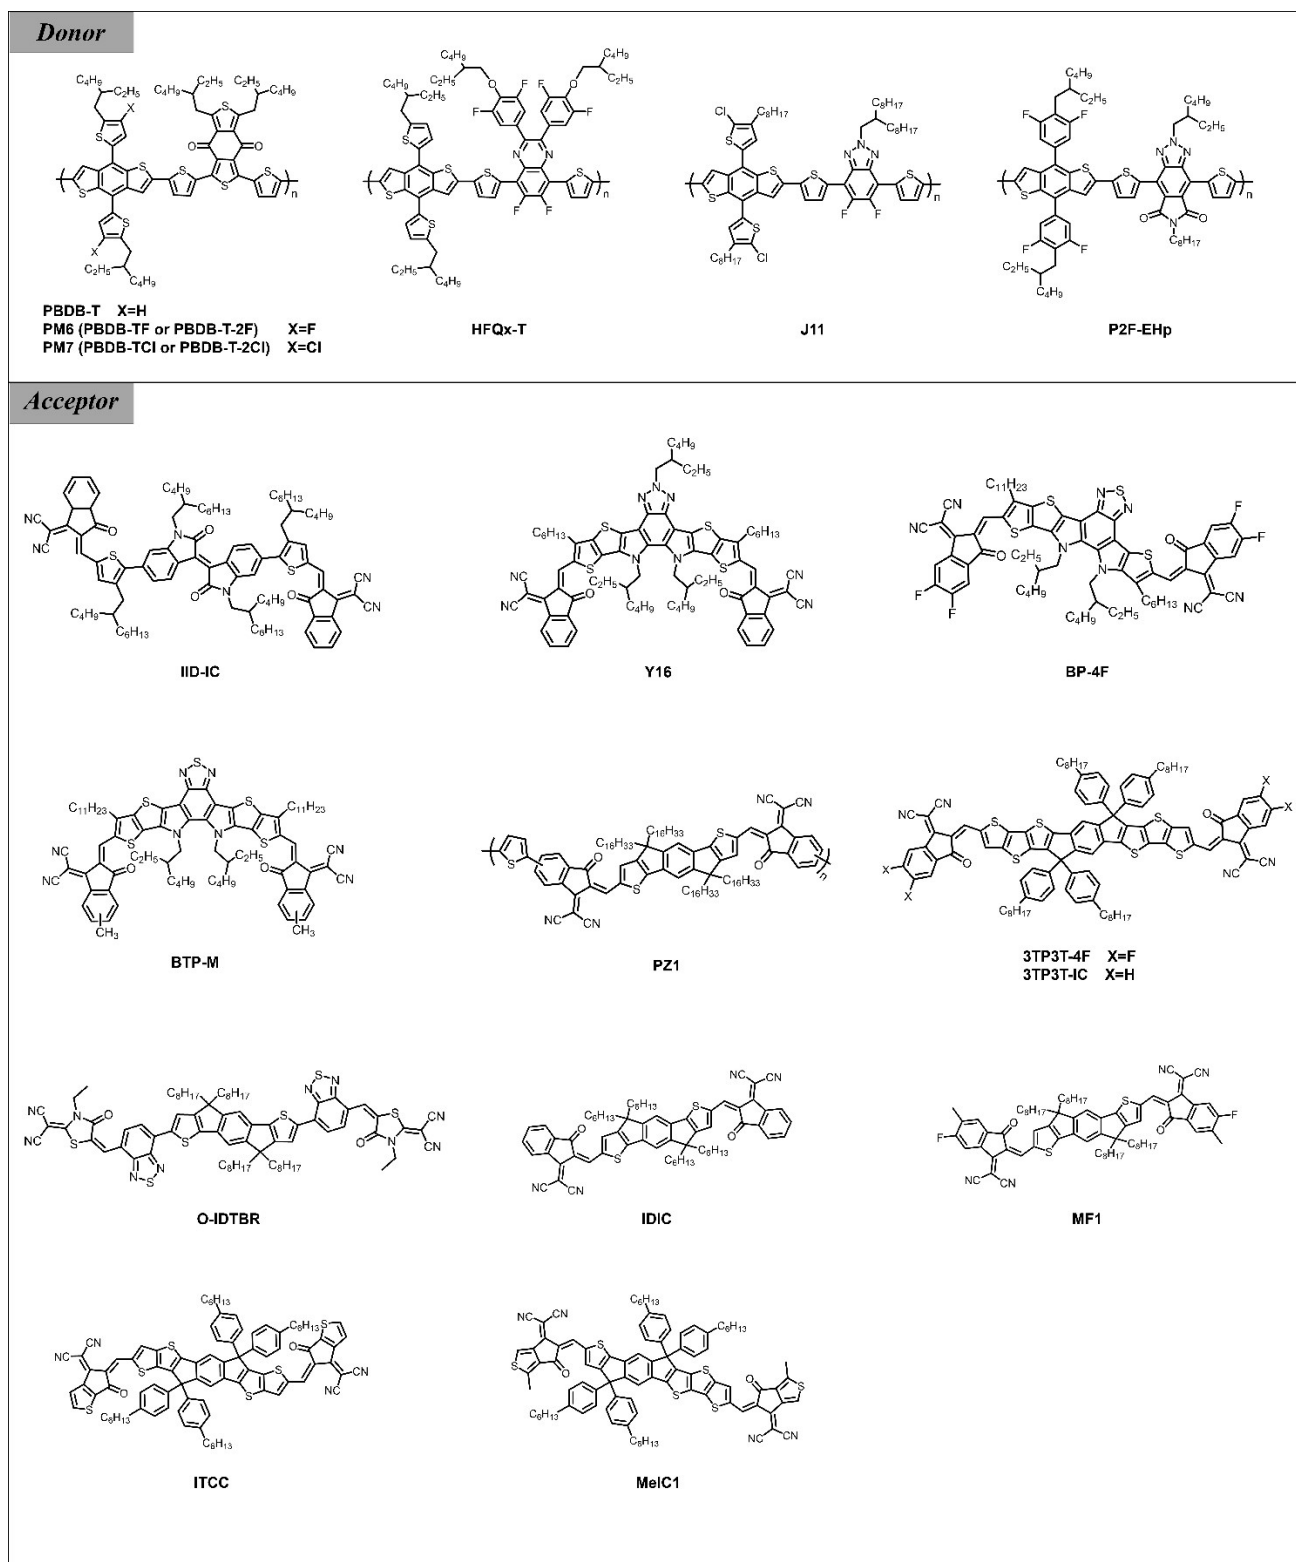

**Figure S1.** Chemical structure of relevant materials.
